# Supplementary material for: Effects of a Prenatal Lifestyle Intervention in Routine Care on Maternal Health Behaviour in the First Year Postpartum—Secondary Findings of the Cluster-Randomised GeliS Trial
Source: MDPI journal article supplement (doi:10.3390/nu13041310), 2021-04-15
Supplement: s1 [file s1]

**Table S1** Healthy Eating Index in subgroups of the intervention and control groups.

|                                 | Intervention Group |              | Control Group |              | n <sup>a</sup> | Adjusted Effect Size <sup>b</sup><br>(95% CI) | Adjusted <i>p</i><br>Value <sup>b</sup> |
|---------------------------------|--------------------|--------------|---------------|--------------|----------------|-----------------------------------------------|-----------------------------------------|
|                                 | n                  | Mean ± SD    | n             | Mean ± SD    |                |                                               |                                         |
| T1pp                            |                    |              |               |              |                |                                               |                                         |
| Pre-pregnancy age category      |                    |              |               |              |                |                                               |                                         |
| Age 18–25 years                 | 107                | 53.83 ± 9.19 | 119           | 51.25 ± 7.72 | 214            | 0.08 (-1.25, 1.41)                            | 0.908                                   |
| Age 26–35 years                 | 687                | 55.84 ± 8.17 | 650           | 55.12 ± 8.35 | 1249           | 0.65 (-0.44, 1.73)                            | 0.243                                   |
| Age 36–43 years                 | 104                | 57.75 ± 8.46 | 123           | 56.56 ± 8.27 | 213            | 0.62 (0.02, 1.22)                             | 0.044                                   |
| Pre-pregnancy BMI category      |                    |              |               |              |                |                                               |                                         |
| BMI 18.5–24.9 kg/m <sup>2</sup> | 584                | 56.08 ± 8.29 | 595           | 55.25 ± 8.41 | 1100           | 0.48 (-0.69, 1.64)                            | 0.421                                   |
| BMI 25.0–29.9 kg/m <sup>2</sup> | 217                | 55.49 ± 8.25 | 189           | 54.10 ± 8.37 | 379            | 1.28 (0.92, 1.64)                             | <0.001                                  |
| BMI 30.0–40.0 kg/m <sup>2</sup> | 97                 | 54.98 ± 9.12 | 109           | 53.63 ± 8.10 | 197            | 0.95 (-0.73, 2.63)                            | 0.266                                   |
| Educational level <sup>c</sup>  |                    |              |               |              |                |                                               |                                         |
| General secondary school        | 124                | 52.93 ± 8.36 | 143           | 50.93 ± 8.42 | 251            | 1.37 (-0.59, 3.33)                            | 0.171                                   |
| Intermediate secondary school   | 388                | 54.97 ± 8.12 | 371           | 54.38 ± 7.99 | 707            | 0.22 (-0.59, 1.03)                            | 0.593                                   |
| High school                     | 386                | 57.60 ± 8.25 | 378           | 56.69 ± 8.21 | 718            | 0.74 (-0.30, 1.77)                            | 0.162                                   |
| Parity                          |                    |              |               |              |                |                                               |                                         |
| Primiparous                     | 574                | 55.47 ± 8.30 | 487           | 54.05 ± 8.36 | 993            | 0.89 (-0.30, 2.09)                            | 0.142                                   |
| Multiparous                     | 324                | 56.44 ± 8.48 | 406           | 55.72 ± 8.32 | 683            | 0.15 (-0.10, 0.40)                            | 0.248                                   |
| T2pp                            |                    |              |               |              |                |                                               |                                         |
| Pre-pregnancy age category      |                    |              |               |              |                |                                               |                                         |
| Age 18–25 years                 | 88                 | 54.77 ± 8.80 | 94            | 52.31 ± 9.47 | 171            | 1.07 (-0.47, 2.62)                            | 0.172                                   |
| Age 26–35 years                 | 605                | 56.30 ± 8.78 | 572           | 55.29 ± 8.27 | 1117           | 0.84 (0.18, 1.51)                             | 0.013                                   |
| Age 36–43 years                 | 98                 | 57.03 ± 8.76 | 110           | 56.59 ± 7.08 | 197            | 1.01 (-0.61, 2.64)                            | 0.222                                   |
| Pre-pregnancy BMI category      |                    |              |               |              |                |                                               |                                         |
| BMI 18.5–24.9 kg/m <sup>2</sup> | 513                | 56.55 ± 8.90 | 506           | 55.44 ± 8.55 | 966            | 0.78 (-0.13, 1.69)                            | 0.093                                   |
| BMI 25.0–29.9 kg/m <sup>2</sup> | 186                | 55.59 ± 7.85 | 178           | 54.27 ± 8.02 | 343            | 1.29 (-0.03, 2.61)                            | 0.055                                   |
| BMI 30.0–40.0 kg/m <sup>2</sup> | 92                 | 55.65 ± 9.85 | 93            | 54.88 ± 7.62 | 176            | 0.25 (-2.51, 3.00)                            | 0.861                                   |
| Educational level <sup>c</sup>  |                    |              |               |              |                |                                               |                                         |
| General secondary school        | 96                 | 53.00 ± 9.08 | 117           | 51.73 ± 8.82 | 203            | 0.50 (-0.26, 1.27)                            | 0.200                                   |
| Intermediate secondary school   | 347                | 55.57 ± 7.93 | 322           | 54.21 ± 8.27 | 633            | 1.35 (0.78, 1.91)                             | <0.001                                  |
| High school                     | 347                | 57.77 ± 9.22 | 337           | 57.15 ± 7.69 | 648            | 0.84 (-0.58, 2.26)                            | 0.245                                   |
| Parity                          |                    |              |               |              |                |                                               |                                         |
| Primiparous                     | 499                | 55.98 ± 8.92 | 419           | 54.83 ± 8.37 | 869            | 0.71 (-0.31, 1.73)                            | 0.175                                   |
| Multiparous                     | 292                | 56.64 ± 8.55 | 358           | 55.43 ± 8.29 | 616            | 1.07 (0.33, 1.82)                             | 0.005                                   |

Abbreviations: BMI: body mass index; T1pp: assessment 6–8 weeks postpartum; T2pp: assessment one year postpartum; SD: standard deviation; CI: confidence interval. <sup>a</sup> The total of participant numbers varies due to the applied covariates. <sup>b</sup> Linear regression models fit using generalised estimating equations adjusted for pre-pregnancy BMI category, age, parity, baseline assessment and time interval between questionnaire completion date and birth date of the child. <sup>c</sup> General secondary school: general school which is completed through year 9; intermediate secondary school: vocational secondary school which is completed through year 10; high school: academic high school which is completed through year 12 or 13.

**Table S2** Total physical activity in subgroups of the intervention and control groups.

|                                 | Intervention Group |                | Control Group |                | n <sup>a</sup> | Adjusted Effect Size <sup>b</sup> (95% CI) | Adjusted <i>p</i> Value <sup>b</sup> |
|---------------------------------|--------------------|----------------|---------------|----------------|----------------|--------------------------------------------|--------------------------------------|
|                                 | n                  | Mean ± SD      | n             | Mean ± SD      |                |                                            |                                      |
| T1pp                            |                    |                |               |                |                |                                            |                                      |
| Pre-pregnancy age category      |                    |                |               |                |                |                                            |                                      |
| Age 18–25 years                 | 97                 | 190.99 ± 64.86 | 116           | 202.95 ± 73.21 | 193            | -16.28 (-32.09, -0.47)                     | 0.044                                |
| Age 26–35 years                 | 654                | 177.97 ± 64.41 | 627           | 180.57 ± 68.95 | 1146           | 1.18 (-3.33, 5.68)                         | 0.608                                |
| Age 36–43 years                 | 102                | 174.28 ± 59.20 | 119           | 176.33 ± 60.65 | 199            | -5.01 (-14.71, 4.68)                       | 0.311                                |
| Pre-pregnancy BMI category      |                    |                |               |                |                |                                            |                                      |
| BMI 18.5–24.9 kg/m <sup>2</sup> | 555                | 179.11 ± 65.10 | 575           | 182.43 ± 68.46 | 1013           | -4.18 (-8.30, -0.06)                       | 0.047                                |
| BMI 25.0–29.9 kg/m <sup>2</sup> | 206                | 176.30 ± 60.44 | 184           | 181.44 ± 69.28 | 349            | -2.03 (-8.43, 4.37)                        | 0.534                                |
| BMI 30.0–40.0 kg/m <sup>2</sup> | 92                 | 184.43 ± 64.86 | 104           | 189.00 ± 70.27 | 176            | 0.18 (-11.41, 11.77)                       | 0.975                                |
| Educational level <sup>c</sup>  |                    |                |               |                |                |                                            |                                      |
| General secondary school        | 116                | 185.30 ± 78.95 | 137           | 198.96 ± 79.58 | 214            | -17.54 (-33.64, -1.44)                     | 0.033                                |
| Intermediate secondary school   | 369                | 177.39 ± 61.04 | 357           | 182.31 ± 70.08 | 654            | 0.06 (-4.24, 4.37)                         | 0.977                                |
| High school                     | 368                | 178.65 ± 61.55 | 368           | 177.71 ± 62.35 | 670            | 1.43 (-6.83, 9.68)                         | 0.735                                |
| Parity                          |                    |                |               |                |                |                                            |                                      |
| Primiparous                     | 541                | 176.30 ± 61.01 | 467           | 182.27 ± 68.07 | 911            | -8.59 (-13.59, -3.59)                      | 0.001                                |
| Multiparous                     | 312                | 183.71 ± 68.60 | 396           | 183.88 ± 69.76 | 627            | 4.92 (-0.24, 10.07)                        | 0.062                                |
| T2pp                            |                    |                |               |                |                |                                            |                                      |
| Pre-pregnancy age category      |                    |                |               |                |                |                                            |                                      |
| Age 18–25 years                 | 78                 | 205.59 ± 70.85 | 87            | 207.26 ± 78.15 | 144            | 3.22 (-19.70, 26.13)                       | 0.783                                |
| Age 26–35 years                 | 588                | 188.45 ± 65.11 | 545           | 186.44 ± 69.92 | 1016           | 2.86 (-6.07, 11.79)                        | 0.530                                |
| Age 36–43 years                 | 88                 | 181.49 ± 53.59 | 105           | 180.78 ± 67.41 | 178            | 2.35 (-12.51, 17.22)                       | 0.756                                |
| Pre-pregnancy BMI category      |                    |                |               |                |                |                                            |                                      |
| BMI 18.5–24.9 kg/m <sup>2</sup> | 471                | 190.64 ± 62.10 | 480           | 186.47 ± 70.81 | 867            | 5.14 (-2.32, 12.60)                        | 0.177                                |
| BMI 25.0–29.9 kg/m <sup>2</sup> | 166                | 185.61 ± 64.83 | 168           | 193.16 ± 67.97 | 308            | -6.58 (-17.75, 4.58)                       | 0.248                                |
| BMI 30.0–40.0 kg/m <sup>2</sup> | 87                 | 190.35 ± 77.36 | 89            | 187.25 ± 76.67 | 163            | 11.05 (-1.99, 24.08)                       | 0.097                                |
| Educational level <sup>c</sup>  |                    |                |               |                |                |                                            |                                      |
| General secondary school        | 86                 | 205.93 ± 80.21 | 109           | 201.76 ± 79.51 | 166            | -1.25 (-24.56, 22.06)                      | 0.916                                |
| Intermediate secondary school   | 320                | 187.99 ± 63.17 | 305           | 192.53 ± 77.18 | 581            | 0.06 (-13.36, 13.48)                       | 0.993                                |
| High school                     | 317                | 186.42 ± 61.02 | 323           | 179.28 ± 59.79 | 591            | 4.29 (-5.04, 13.62)                        | 0.368                                |
| Parity                          |                    |                |               |                |                |                                            |                                      |
| Primiparous                     | 460                | 189.05 ± 65.13 | 397           | 187.43 ± 66.78 | 782            | 1.22 (-10.58, 13.01)                       | 0.840                                |
| Multiparous                     | 264                | 190.16 ± 63.99 | 340           | 188.86 ± 78.45 | 556            | 6.55 (2.10, 11.00)                         | 0.004                                |

Abbreviations: BMI: body mass index; T1pp: assessment 6-8 weeks postpartum; T2pp: assessment one year postpartum; SD: standard deviation; CI: confidence interval. <sup>a</sup> The total of participant numbers varies due to the applied covariates. <sup>b</sup> Linear regression models fit using generalised estimating equations adjusted for pre-pregnancy BMI category, age, parity, baseline assessment and time interval between questionnaire completion date and birth date of the child. <sup>c</sup> General secondary school: general school which is completed through year 9; intermediate secondary school: vocational secondary school which is completed through year 10; high school: academic high school which is completed through year 12 or 13.

**Table S3** Meeting physical activity recommendations in subgroups of the intervention and control groups.

|                                 | Intervention Group |       | Control Group |       | n <sup>a</sup> | Adjusted OR <sup>b</sup> (95% CI) | Adjusted <i>p</i> Value <sup>b</sup> |
|---------------------------------|--------------------|-------|---------------|-------|----------------|-----------------------------------|--------------------------------------|
|                                 | n                  | %     | n             | %     |                |                                   |                                      |
| T1pp                            |                    |       |               |       |                |                                   |                                      |
| Pre-pregnancy age category      |                    |       |               |       |                |                                   |                                      |
| Age 18–25 years                 | 57/103             | 55.3% | 58/118        | 49.2% | 214            | 1.28 (1.01, 1.62)                 | 0.044                                |
| Age 26–35 years                 | 358/676            | 53.0% | 308/645       | 47.8% | 1259           | 1.13 (0.99, 1.29)                 | 0.067                                |
| Age 36–43 years                 | 51/105             | 48.6% | 49/124        | 39.5% | 218            | 1.12 (0.87, 1.44)                 | 0.372                                |
| Pre-pregnancy BMI category      |                    |       |               |       |                |                                   |                                      |
| BMI 18.5–24.9 kg/m <sup>2</sup> | 315/576            | 54.7% | 283/592       | 47.8% | 1111           | 1.20 (1.05, 1.37)                 | 0.007                                |
| BMI 25.0–29.9 kg/m <sup>2</sup> | 104/213            | 48.8% | 86/190        | 45.3% | 387            | 1.08 (0.75, 1.55)                 | 0.686                                |
| BMI 30.0–40.0 kg/m <sup>2</sup> | 47/95              | 49.5% | 46/106        | 43.4% | 193            | 1.16 (0.95, 1.43)                 | 0.149                                |
| Educational level <sup>c</sup>  |                    |       |               |       |                |                                   |                                      |
| General secondary school        | 54/121             | 44.6% | 62/143        | 43.4% | 254            | 1.09 (0.90, 1.31)                 | 0.388                                |
| Intermediate secondary school   | 206/384            | 53.6% | 169/366       | 46.2% | 715            | 1.16 (0.96, 1.40)                 | 0.130                                |
| High school                     | 206/379            | 54.4% | 184/378       | 48.7% | 722            | 1.21 (0.91, 1.59)                 | 0.185                                |
| Parity                          |                    |       |               |       |                |                                   |                                      |
| Primiparous                     | 337/566            | 59.5% | 260/482       | 53.9% | 1004           | 1.26 (1.05, 1.51)                 | 0.014                                |
| Multiparous                     | 129/318            | 40.6% | 155/406       | 38.2% | 687            | 0.96 (0.85, 1.09)                 | 0.529                                |
| T2pp                            |                    |       |               |       |                |                                   |                                      |
| Pre-pregnancy age category      |                    |       |               |       |                |                                   |                                      |
| Age 18–25 years                 | 48/82              | 58.5% | 49/89         | 55.1% | 165            | 0.84 (0.48, 1.47)                 | 0.536                                |
| Age 26–35 years                 | 344/579            | 59.4% | 311/556       | 55.9% | 1108           | 1.12 (1.05, 1.20)                 | 0.001                                |
| Age 36–43 years                 | 47/95              | 49.5% | 56/107        | 52.3% | 194            | 0.59 (0.27, 1.28)                 | 0.180                                |
| Pre-pregnancy BMI category      |                    |       |               |       |                |                                   |                                      |
| BMI 18.5–24.9 kg/m <sup>2</sup> | 295/488            | 60.5% | 286/490       | 58.4% | 949            | 0.95 (0.70, 1.28)                 | 0.720                                |
| BMI 25.0–29.9 kg/m <sup>2</sup> | 100/179            | 55.9% | 83/172        | 48.3% | 342            | 1.47 (1.10, 1.96)                 | 0.009                                |
| BMI 30.0–40.0 kg/m <sup>2</sup> | 44/89              | 49.4% | 47/91         | 51.6% | 176            | 0.71 (0.47, 1.09)                 | 0.122                                |
| Educational level <sup>c</sup>  |                    |       |               |       |                |                                   |                                      |
| General secondary school        | 46/89              | 51.7% | 48/111        | 43.2% | 196            | 1.09 (0.81, 1.47)                 | 0.572                                |
| Intermediate secondary school   | 189/333            | 56.8% | 162/311       | 52.1% | 628            | 1.04 (0.68, 1.60)                 | 0.857                                |
| High school                     | 203/333            | 61.0% | 206/330       | 62.4% | 642            | 0.85 (0.60, 1.21)                 | 0.372                                |
| Parity                          |                    |       |               |       |                |                                   |                                      |
| Primiparous                     | 296/477            | 62.1% | 265/405       | 65.4% | 858            | 0.83 (0.67, 1.03)                 | 0.094                                |
| Multiparous                     | 143/279            | 51.3% | 151/348       | 43.4% | 609            | 1.44 (1.23, 1.68)                 | <0.001                               |

Abbreviations: BMI: body mass index; T1pp: assessment 6–8 weeks postpartum; T2pp: assessment one year postpartum; OR: odds ratio. <sup>a</sup> The total of participant numbers varies due to the applied covariates. <sup>b</sup> Binary logistic regression models fit using generalised estimating equations adjusted for pre-pregnancy BMI category, age, parity, baseline assessment and time interval between questionnaire completion date and birth date of the child. <sup>c</sup> General secondary school: general school which is completed through year 9; intermediate secondary school: vocational secondary school which is completed through year 10; high school: academic high school which is completed through year 12 or 13.

**Table S4** Sedentary activity in subgroups of the intervention and control groups.

|                                 | Intervention Group |               | Control Group |               | n <sup>a</sup> | Adjusted Effect Size <sup>b</sup><br>(95% CI) | Adjusted <i>p</i><br>Value <sup>b</sup> |
|---------------------------------|--------------------|---------------|---------------|---------------|----------------|-----------------------------------------------|-----------------------------------------|
|                                 | n                  | Mean ± SD     | n             | Mean ± SD     |                |                                               |                                         |
| T1pp                            |                    |               |               |               |                |                                               |                                         |
| Pre-pregnancy age category      |                    |               |               |               |                |                                               |                                         |
| Age 18–25 years                 | 107                | 11.22 ± 11.63 | 120           | 13.29 ± 11.70 | 208            | -3.09 (-5.44, -0.74)                          | 0.010                                   |
| Age 26–35 years                 | 690                | 10.17 ± 9.96  | 653           | 10.58 ± 10.22 | 1243           | -0.62 (-1.54, 0.30)                           | 0.185                                   |
| Age 36–43 years                 | 106                | 8.31 ± 8.12   | 125           | 9.08 ± 9.16   | 213            | -0.92 (-2.32, 0.48)                           | 0.198                                   |
| Pre-pregnancy BMI category      |                    |               |               |               |                |                                               |                                         |
| BMI 18.5–24.9 kg/m <sup>2</sup> | 589                | 9.63 ± 9.30   | 598           | 10.60 ± 10.37 | 1092           | -1.41 (-2.66, -0.16)                          | 0.027                                   |
| BMI 25.0–29.9 kg/m <sup>2</sup> | 216                | 10.90 ± 11.42 | 192           | 11.02 ± 9.93  | 380            | 0.16 (-1.49, 1.81)                            | 0.853                                   |
| BMI 30.0–40.0 kg/m <sup>2</sup> | 98                 | 10.95 ± 10.55 | 109           | 10.88 ± 10.96 | 192            | 0.14 (-1.22, 1.49)                            | 0.844                                   |
| Educational level <sup>c</sup>  |                    |               |               |               |                |                                               |                                         |
| General secondary school        | 122                | 9.84 ± 10.44  | 143           | 13.36 ± 12.68 | 236            | -3.36 (-5.73, -1.00)                          | 0.005                                   |
| Intermediate secondary school   | 392                | 9.83 ± 9.81   | 373           | 11.03 ± 10.52 | 703            | -2.15 (-3.10, -1.21)                          | <0.001                                  |
| High school                     | 389                | 10.41 ± 10.04 | 382           | 9.46 ± 8.91   | 725            | 0.93 (0.29, 1.57)                             | 0.004                                   |
| Parity                          |                    |               |               |               |                |                                               |                                         |
| Primiparous                     | 573                | 11.30 ± 10.82 | 489           | 12.41 ± 11.26 | 989            | -1.13 (-2.37, 0.11)                           | 0.075                                   |
| Multiparous                     | 330                | 7.96 ± 7.96   | 410           | 8.71 ± 8.71   | 675            | -0.69 (-1.98, 0.60)                           | 0.295                                   |
| T2pp                            |                    |               |               |               |                |                                               |                                         |
| Pre-pregnancy age category      |                    |               |               |               |                |                                               |                                         |
| Age 18–25 years                 | 81                 | 8.90 ± 7.96   | 88            | 9.87 ± 8.87   | 152            | -0.27 (-2.25, 1.70)                           | 0.787                                   |
| Age 26–35 years                 | 595                | 6.99 ± 5.65   | 561           | 7.36 ± 6.03   | 1099           | -0.45 (-1.05, 0.16)                           | 0.146                                   |
| Age 36–43 years                 | 97                 | 6.37 ± 5.25   | 110           | 7.25 ± 7.00   | 195            | -0.99 (-2.22, 0.25)                           | 0.118                                   |
| Pre-pregnancy BMI category      |                    |               |               |               |                |                                               |                                         |
| BMI 18.5–24.9 kg/m <sup>2</sup> | 500                | 6.67 ± 5.30   | 495           | 7.33 ± 6.45   | 938            | -0.67 (-1.38, 0.03)                           | 0.061                                   |
| BMI 25.0–29.9 kg/m <sup>2</sup> | 183                | 7.62 ± 6.05   | 173           | 7.91 ± 5.89   | 338            | -0.11 (-0.48, 0.25)                           | 0.547                                   |
| BMI 30.0–40.0 kg/m <sup>2</sup> | 90                 | 8.48 ± 8.25   | 91            | 8.79 ± 8.43   | 170            | -1.06 (-1.82, -0.30)                          | 0.006                                   |
| Educational level <sup>c</sup>  |                    |               |               |               |                |                                               |                                         |
| General secondary school        | 91                 | 8.23 ± 7.06   | 112           | 9.21 ± 8.53   | 184            | -1.48 (-3.02, 0.06)                           | 0.060                                   |
| Intermediate secondary school   | 342                | 7.74 ± 6.30   | 313           | 7.82 ± 6.30   | 620            | -0.51 (-1.22, 0.20)                           | 0.158                                   |
| High school                     | 339                | 6.44 ± 5.07   | 334           | 6.94 ± 6.04   | 641            | -0.26 (-0.93, 0.41)                           | 0.443                                   |
| Parity                          |                    |               |               |               |                |                                               |                                         |
| Primiparous                     | 489                | 7.52 ± 6.46   | 406           | 8.08 ± 6.84   | 844            | -0.52 (-1.05, 0.01)                           | 0.053                                   |
| Multiparous                     | 284                | 6.41 ± 4.78   | 353           | 7.13 ± 6.29   | 602            | -0.86 (-1.41, -0.32)                          | 0.002                                   |

Abbreviations: BMI: body mass index; T1pp: assessment 6-8 weeks postpartum; T2pp: assessment one year postpartum; SD: standard deviation; CI: confidence interval. <sup>a</sup> The total of participant numbers varies due to the applied covariates. <sup>b</sup> Linear regression models fit using generalised estimating equations adjusted for pre-pregnancy BMI category, age, parity, baseline assessment and time interval between questionnaire completion date and birth date of the child. <sup>c</sup> General secondary school: general school which is completed through year 9; intermediate secondary school: vocational secondary school which is completed through year 10; high school: academic high school which is completed through year 12 or 13.

**Table S5** Smoking in subgroups of the intervention and control groups.

|                                 | Intervention Group |       | Control Group |       | n <sup>a</sup> | Adjusted OR <sup>b</sup> (95% CI) | Adjusted <i>p</i> Value <sup>b</sup> |
|---------------------------------|--------------------|-------|---------------|-------|----------------|-----------------------------------|--------------------------------------|
|                                 | n                  | %     | n             | %     |                |                                   |                                      |
| T1pp                            |                    |       |               |       |                |                                   |                                      |
| Pre-pregnancy age category      |                    |       |               |       |                |                                   |                                      |
| Age 18–25 years                 | 17/109             | 15.6% | 28/121        | 23.1% | 223            | 0.38 (0.21, 0.68)                 | 0.001                                |
| Age 26–35 years                 | 39/692             | 5.6%  | 49/661        | 7.4%  | 1289           | 0.79 (0.67, 0.94)                 | 0.009                                |
| Age 36–43 years                 | 8/104              | 7.7%  | 11/127        | 8.7%  | 221            | 0.29 (0.09, 0.95)                 | 0.041                                |
| Pre-pregnancy BMI category      |                    |       |               |       |                |                                   |                                      |
| BMI 18.5–24.9 kg/m <sup>2</sup> | 43/590             | 7.3%  | 49/604        | 8.1%  | 1137           | 0.76 (0.60, 0.96)                 | 0.019                                |
| BMI 25.0–29.9 kg/m <sup>2</sup> | 11/218             | 5.0%  | 22/194        | 11.3% | 395            | 0.34 (0.16, 0.70)                 | 0.004                                |
| BMI 30.0–40.0 kg/m <sup>2</sup> | 10/97              | 10.3% | 17/112        | 15.2% | 201            | 0.23 (0.02, 2.39)                 | 0.218                                |
| Educational level <sup>c</sup>  |                    |       |               |       |                |                                   |                                      |
| General secondary school        | 22/124             | 17.7% | 37/146        | 25.3% | 258            | 0.63 (0.38, 1.03)                 | 0.063                                |
| Intermediate secondary school   | 34/392             | 8.7%  | 42/377        | 11.1% | 734            | 0.51 (0.40, 0.66)                 | <0.001                               |
| High school                     | 8/389              | 2.1%  | 9/386         | 2.3%  | 741            | 1.17 (0.74, 1.85)                 | 0.491                                |
| Parity                          |                    |       |               |       |                |                                   |                                      |
| Primiparous                     | 37/576             | 6.4%  | 40/493        | 8.1%  | 1026           | 0.50 (0.40, 0.62)                 | <0.001                               |
| Multiparous                     | 27/329             | 8.2%  | 48/417        | 11.5% | 707            | 0.55 (0.28, 1.06)                 | 0.074                                |
| T2pp                            |                    |       |               |       |                |                                   |                                      |
| Pre-pregnancy age category      |                    |       |               |       |                |                                   |                                      |
| Age 18–25 years                 | 19/88              | 21.6% | 28/94         | 29.8% | 176            | 0.62 (0.32, 1.20)                 | 0.156                                |
| Age 26–35 years                 | 73/600             | 12.2% | 71/568        | 12.5% | 1137           | 1.00 (0.89, 1.11)                 | 0.955                                |
| Age 36–43 years                 | 11/97              | 11.3% | 10/109        | 9.2%  | 199            | 5.08 (0.79, 32.82)                | 0.088                                |
| Pre-pregnancy BMI category      |                    |       |               |       |                |                                   |                                      |
| BMI 18.5–24.9 kg/m <sup>2</sup> | 63/509             | 12.4% | 65/504        | 12.9% | 984            | 0.82 (0.70, 0.96)                 | 0.017                                |
| BMI 25.0–29.9 kg/m <sup>2</sup> | 28/184             | 15.2% | 26/175        | 14.9% | 349            | 1.11 (0.60, 2.06)                 | 0.743                                |
| BMI 30.0–40.0 kg/m <sup>2</sup> | 12/92              | 13.0% | 18/93         | 19.4% | 179            | 0.45 (0.21, 0.97)                 | 0.040                                |
| Educational level <sup>c</sup>  |                    |       |               |       |                |                                   |                                      |
| General secondary school        | 19/96              | 19.8% | 26/116        | 22.4% | 205            | 0.70 (0.46, 1.08)                 | 0.110                                |
| Intermediate secondary school   | 52/342             | 15.2% | 65/320        | 20.3% | 645            | 0.67 (0.54, 0.83)                 | <0.001                               |
| High school                     | 32/346             | 9.2%  | 18/335        | 5.4%  | 661            | 1.39 (0.87, 2.21)                 | 0.172                                |
| Parity                          |                    |       |               |       |                |                                   |                                      |
| Primiparous                     | 67/497             | 13.5% | 53/418        | 12.7% | 890            | 0.90 (0.78, 1.03)                 | 0.136                                |
| Multiparous                     | 36/288             | 12.5% | 56/354        | 15.8% | 622            | 0.70 (0.45, 1.08)                 | 0.106                                |

Abbreviations: BMI: body mass index; T1pp: assessment 6–8 weeks postpartum; T2pp: assessment one year postpartum; OR: odds ratio. <sup>a</sup> The total of participant numbers varies due to the applied covariates. <sup>b</sup> Binary logistic regression models fit using generalised estimating equations adjusted for pre-pregnancy BMI category, age, parity, baseline assessment and time interval between questionnaire completion date and birth date of the child. <sup>c</sup> General secondary school: general school which is completed through year 9; intermediate secondary school: vocational secondary school which is completed through year 10; high school: academic high school which is completed through year 12 or 13.
